# Supplementary material for: Synthesis of Fe3O4 and Pt nanoparticles on reduced graphene oxide and their use as a recyclable catalyst
Source: Royal Society of Chemistry journal article supplement (doi:10.1039/c2nr11992g), 2012-01-01
Supplement: c2nr11992g.pdf [file c2nr11992g.pdf]

Supporting Information

Synthesis of Fe<sub>3</sub>O<sub>4</sub> and Pt nanoparticles on reduced graphene oxide used as  
recyclable catalyst

Shixin Wu,<sup>a#</sup> Qiyuan He,<sup>a#</sup> Chunmei Zhou,<sup>b</sup> Xiaoying Qi,<sup>c</sup> Xiao Huang,<sup>a</sup> Zongyou Yin,<sup>a</sup> Yanhui Yang,<sup>\*b</sup> and Hua  
Zhang<sup>\*a</sup>

<sup>a</sup> School of Materials Science and Engineering, Nanyang Technological University, 50 Nanyang Avenue,  
Singapore 639798, Singapore

<sup>b</sup> School of Chemical and Biomedical Engineering, Nanyang Technological University, Singapore 637459,  
Singapore

<sup>c</sup> Singapore Institute of Manufacturing Technology, 71 Nanyang Drive, Singapore 638075, Singapore

<sup>#</sup> These authors contributed equally to this work.

\* Corresponding authors. E-mail: [HZhang@ntu.edu.sg](mailto:HZhang@ntu.edu.sg); [YHYang@ntu.edu.sg](mailto:YHYang@ntu.edu.sg)

Website: <http://www.ntu.edu.sg/home/hzhang/>

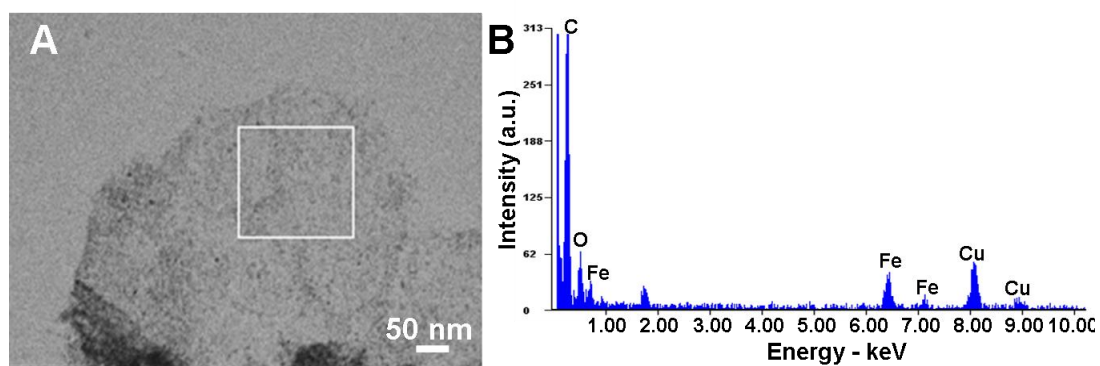

**Fig. S1** (A) TEM images of  $\text{Fe}_3\text{O}_4/\text{rGO}$ . (B) EDS spectrum collected from the rectangular area in (A).

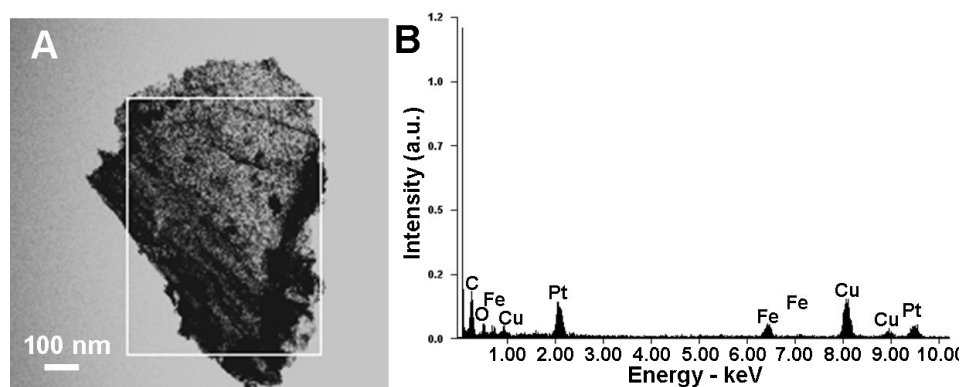

**Fig. S2** (A) TEM image of  $\text{Fe}_3\text{O}_4\text{-Pt/rGO}$ . (B) EDS spectrum collected from the rectangular area in (A).

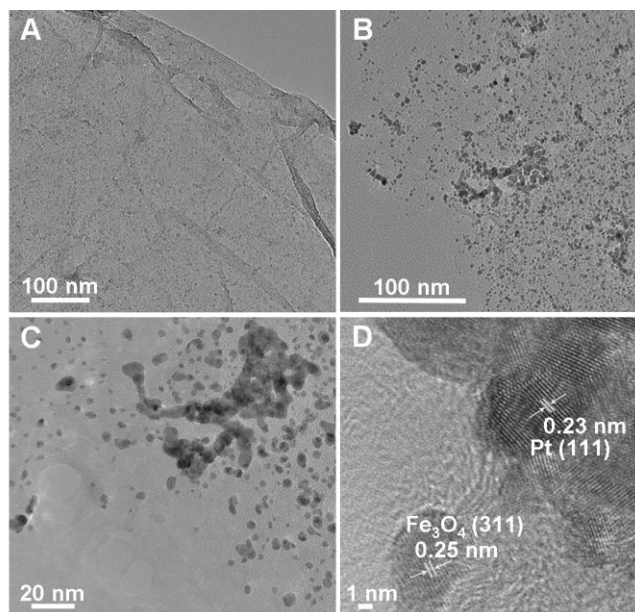

**Fig. S3** (A) TEM images of  $\text{Fe}_3\text{O}_4/\text{rGO}$  synthesized with the mass feed ratio of GO to  $\text{Fe}_3\text{O}_4$  is 1:1. (B, C) TEM images of  $\text{Fe}_3\text{O}_4\text{-Pt}/\text{rGO}$  synthesized by mixing 0.6 mg of  $\text{K}_2\text{PtCl}_6$  and 6 mg of  $\text{Fe}_3\text{O}_4/\text{rGO}$  powder in (A). (D) HRTEM image of a  $\text{Fe}_3\text{O}_4$  nanoparticle and a Pt nanoparticle on rGO.
